# Supplementary material for: Preparation of PtNi nanoparticles for the electrocatalytic oxidation of methanolElectronic supplementary information (ESI) available: TEM images of Pt nanoparticle seeds prepared from the methanol reduction of Pt salts. See http://www.rsc.org/suppdata/jm/b3/b307040a/
Source: Royal Society of Chemistry journal article supplement (doi:10.1039/b307040a), 2003-01-01
Supplement: b307040a.pdf [file b307040a.pdf]

## Electronic Supplementary Information

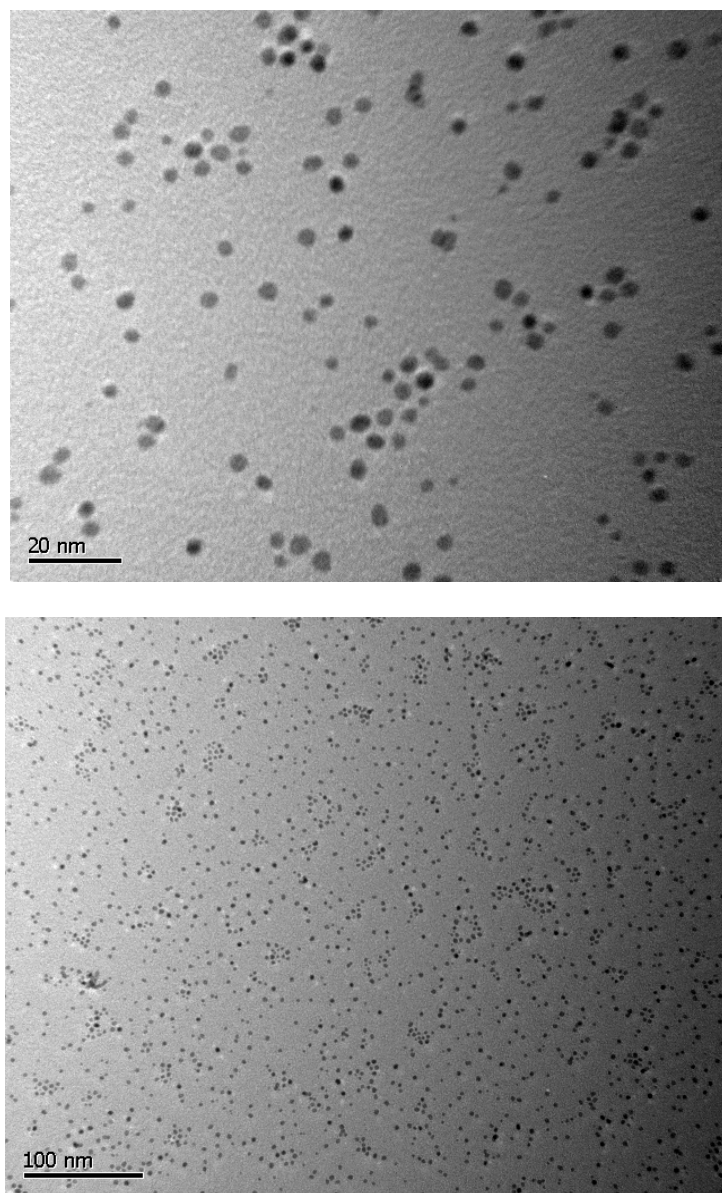

**Figure S1.** TEM Images of Pt nanoparticle seeds prepared from the methanol reduction of Pt salts.
